# Supplementary material for: Safety, Efficacy and Long-Term Outcomes of Patients Treated with the Occlutech Paravalvular Leak Device for Significant Paravalvular Regurgitation
Source: MDPI journal article supplement (doi:10.3390/jcm11071978), 2022-04-01
Supplement: s1 [file s1]

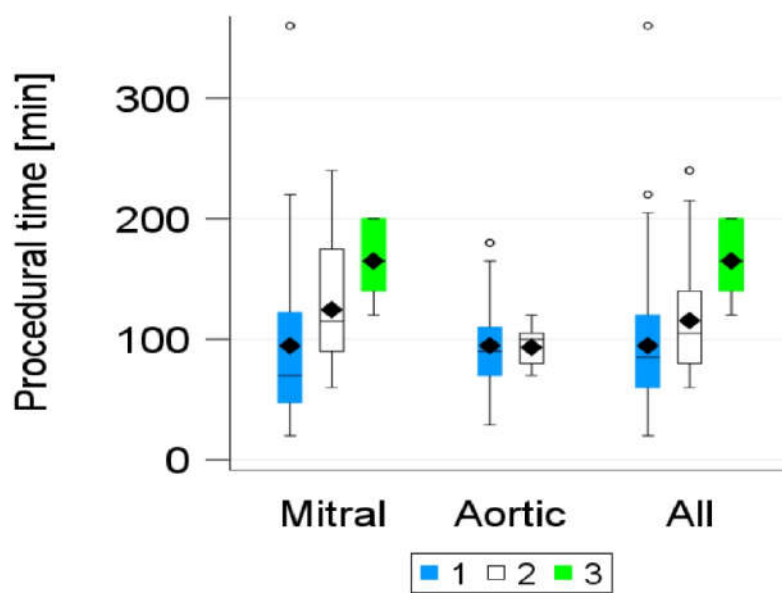

Figure S1. Procedural time [min] per Number of leaks by Stratum (SAF). SAF: safety analysis set.

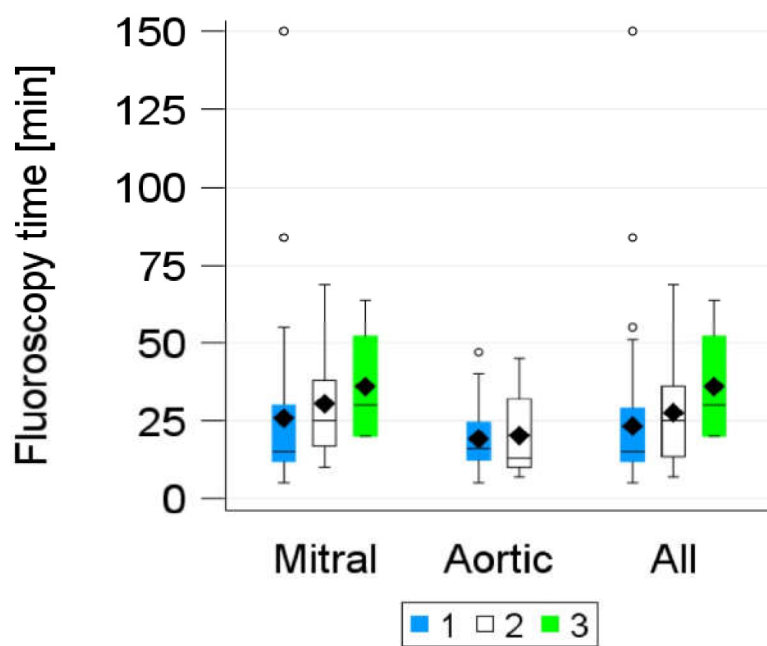

Figure S2. Fluoroscopy time [min] per Number of leaks by Stratum (SAF). SAF: safety analysis set.

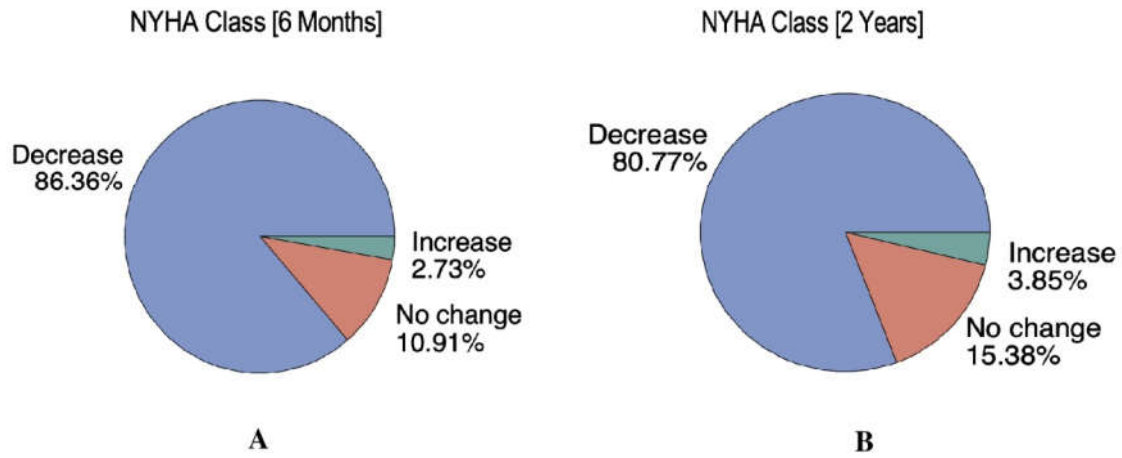

**Figure S3.** Qualitative change for NYHA Class BL vs 6M, FAS (A) and BL vs 2Y, FAS (B). BL: baseline; 6M: 6 months; FAS: full analysis set.

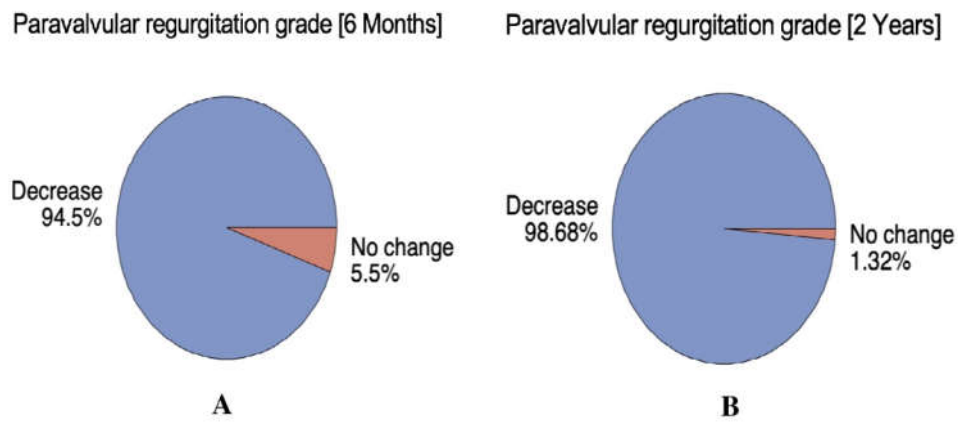

**Figure S4.** Qualitative change (to Base) for paravalvular regurgitation grade BL vs 6M, FAS (A) and BL vs 2Y, FAS (B). BL: baseline; 6M: 6 months; FAS: full analysis set.

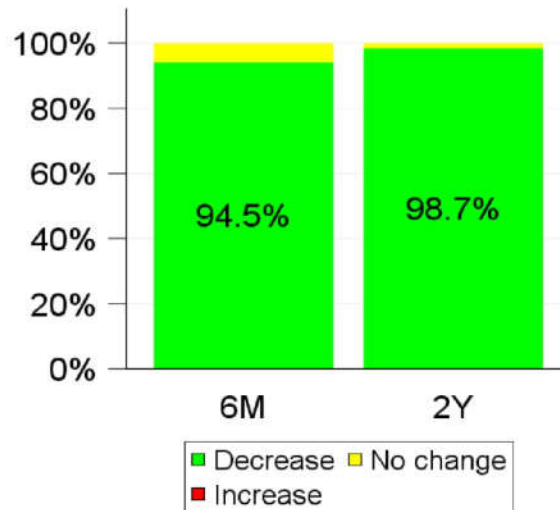

**Figure S5.** Qualitative change (to Base) for Paravalvular regurgitation grade BL vs 6M and 2 Y. BL: baseline; 6M: 6 months; FAS: full analysis set.

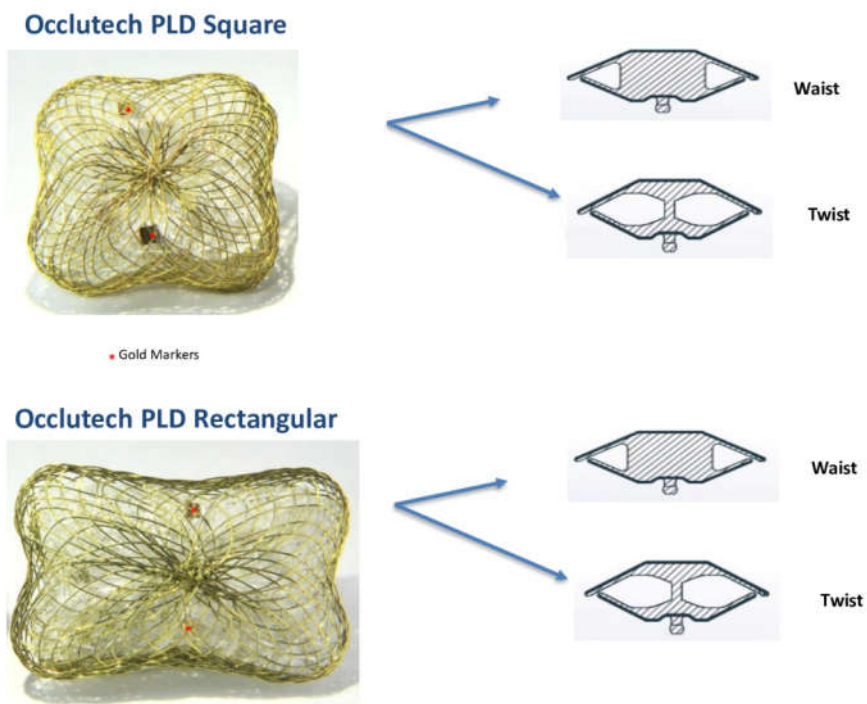

**Figure S6.** The Occlutech ® Paravalvular Leak Device (PLD).

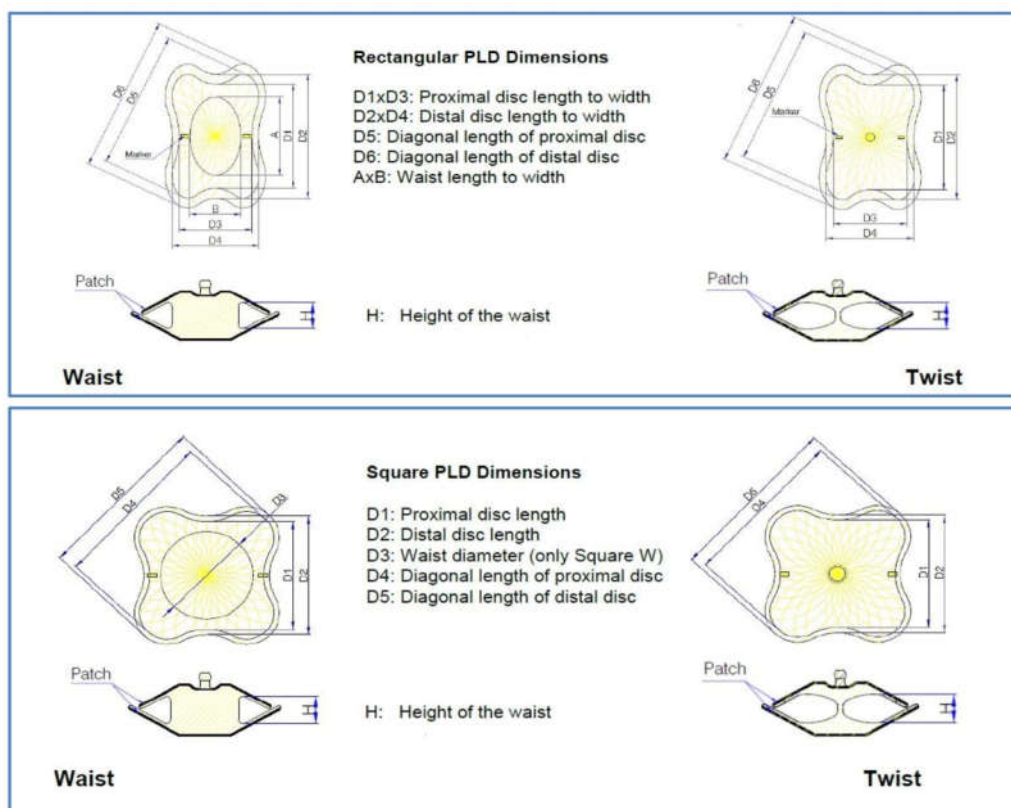

**Figure S7.** Technical drawings showing Rectangular and Square PDL dimensions for the two types of connecting, *waist* and *twist*.

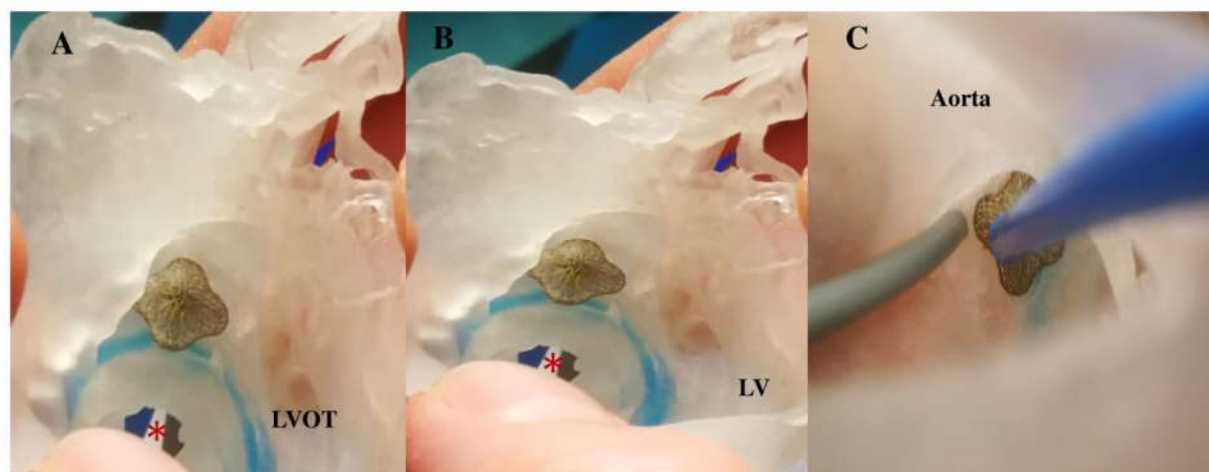

**Figure S8.** 3D patient-specific simulation-guided treatment strategy.
